# Supplementary material
Source: publisher site journal article supplement (https://www.dovepress.com/article/454943)
Supplement: Supplementary file 1 [file get_supplementary_file.php]

**Supplemental Table 1. Multivariate linear regression of dementia progression using delta CASI with subgroups of FGA and SGA.**

| Variable | Units | Coefficient  [95% CI] | p-value |
| --- | --- | --- | --- |
| (Intercept) |  | 32.16 [9.96;54.36] | 0.004 |
| Age | Year | -0.45 [-0.73;-0.18] | 0.001 |
| Sex | Male | -3.39 [-7.76;0.98] | 0.130 |
| Education | Year | -0.10 [-0.58;0.38] | 0.690 |
| Dementia type | AD | Ref |  |
|  | non-AD | -1.42 [-5.69;2.85] | 0.516 |
| CVA | Yes | -4.26 [-10.90;2.39] | 0.210 |
| Walking capability | Free | Ref |  |
|  | Need assistance | 2.89 [-1.78;7.55] | 0.226 |
|  | Wheel-bound | 1.13 [-7.25;9.50] | 0.792 |
| NPI |  | -0.22 [-0.38;-0.05] | 0.011 |
| Antipsychotic use | No | Ref |  |
|  | FGA | 3.07 [-8.53;14.66] | 0.604 |
|  | SGA | 0.23 [-4.74;5.21] | 0.926 |

CASI, Cognitive abilities screening instrument; AD, Alzheimer’s disease; CVA, cerebrovascular accident; NPI, Neuropsychiatric Inventory; FGA, first-generation antipsychotic; SGA, second-generation antipsychotic
